# Supplementary material
Source: PubMed Central journal article supplement (PMC3229926)
Supplement: NIHMS334016-supplement-1_si_001.pdf [file NIHMS334016-supplement-1_si_001.pdf]

# Supporting Information

**Synthesis, Photophysical, Electrochemical, Tumor-Imaging and Phototherapeutic**

**Properties of Purpurinimide-N-substituted Cyanine Dyes**

**Joined with Variable Length of Linkers**

Michael P.A. Williams<sup>1</sup>, Manivannan Ethirajan<sup>1</sup>, Kei Ohkubo<sup>3</sup>, Ping Chen<sup>4</sup>,  
Paula Pera<sup>1</sup>, Janet Morgan<sup>2</sup>, William H. White III<sup>1</sup>, Masayuki Shibata<sup>5,\*</sup>, Shunichi Fukuzumi<sup>3,6\*</sup>,  
Karl M. Kadish<sup>4,\*</sup> and Ravindra K. Pandey<sup>1,\*</sup>

<sup>1</sup>*PDT Center, Department of Cell Stress Biology, Roswell Park Cancer Institute, Buffalo NY, 14263,* <sup>2</sup>*Department of Dermatology, Roswell Park Cancer Institute, Buffalo NY 14263,* <sup>3</sup>*Department of Material and Life Sciences, Graduate School of Engineering, Osaka University, ALCA, Japan Science and Technology Agency (JST), Osaka, Japan,* <sup>4</sup>*Department of Chemistry, University of Houston, Houston, TX 77204-5003,* <sup>5</sup>*Department of Health Informatics, University of Medicine & Dentistry of New Jersey –SHRP, Newark, NJ 07107,* <sup>6</sup>*Department of Bioinspired Science, Ewha Womans University, Seoul 120-750, Korea*

## Contents

Page S1: Title of the paper, authors along with the contents

Page S2-S3: Experimental details for in vitro PDT and *in vivo* reflectance spectroscopy

Page S4-S10: Copies of <sup>1</sup>H NMR spectra of selective analogs

Page S11-S12: HPLC chromatogram of conjugates **7-9**

***In Vitro* Phototoxicity Assay (MTT Assay):** To determine the *in vitro* efficacy of the compounds the following procedure was performed. Colon-26 cells were grown in RPMI 1640 with 10% FCS, 2mM L-Glutamine, 50 IU penicillin/50 µg/ml streptomycin. Cells were maintained in 5 % CO<sub>2</sub> and 95% air at 100% humidity. For phototoxicity studies, Colon-26 cells were plated in 96 well plates at a density of 3500 cells/well in complete medium. 4 h later, compounds were added at concentrations ranging from 0.003 to 1 µM. After 24 h incubation in the dark at 37 °C, the cells were irradiated with laser light from an argon pumped dye laser using fluences of 0-2 J/cm<sup>2</sup> at a dose rate of 3.2 mW/cm<sup>2</sup> with light adjusted to the specific maximum wavelength of each drug. The light treatment is shown in Figure 13. After irradiation, the cells were incubated for 48h. After 48 h, 15 µL/well of 4 mg/ml 3-(4,5-dimethylthiazol-2-yl)-2,5-diphenyltetrazolium bromide MTT in PBS was added, and cells were incubated for a further 4 h. MTT is a yellow water soluble tetrazolium salt that is taken up by cells, reduced to water insoluble purple formazan crystals by metabolically active (viable) cells. The MTT-containing media was removed, and 100µl DMSO was added to solubilize the formazan crystals. The absorbance of the wells was read on a microtiter plate reader at a wavelength of 560 nm. The results were plotted as percent growth of control (untreated) cells vs. concentration range for each individual drug.

***In Vivo* Reflectance Spectroscopy:** *In vivo* reflectance spectroscopy is a non-invasive method of following the pharmacokinetics and measuring the concentration of a photosensitizer in an experimental animal. By measuring the light diffusely reflected from tissue containing the dye, the time at which the concentration is at its maximum can be determined and the light treatment can be delivered at the optimal tumor to normal tissue ratio, for the greatest selectivity. As described in reference 9, monochromatic light was delivered through a quartz fiber which was placed perpendicular to and touching the tissue. At a measured distance (3-5 mm) from the delivery fiber, a pick up fiber is also placed in contact with the tissue. Light is delivered at optical power levels of about 1µW to avoid any potential PDT effects during measurement. Light

$$C = \frac{1}{2 * \epsilon} \left\{ -\sqrt{\mu_s^2 + \frac{4}{3} \alpha_0^2} + \sqrt{\mu_s^2 + \frac{4}{3} \left( \frac{OD}{r} + \alpha_0^2 \right)^2} \right\} \quad \text{Equation 1}$$

that enters the pickup fiber was conducted to a silicon photodiode detector that measured the photocurrent linear in power over 7-8 orders of magnitude. The wavelength was varied from 650-1000 nm and a spectrum of diffusely scattered photons was recorded. The concentration  $C$  was calculated using the formula in equation 1. Where  $\epsilon$  is the molar extinction coefficient,  $\alpha_0$  is the intrinsic tissue coefficient, OD is diffuse optical density,  $\mu_3$  is the reduced scattering coefficient,  $r$  is the distance from the detector to the pickup fiber. Molar extinction coefficient ( $\epsilon$ ) is measured using the Beer- Lambert law ( $A = \epsilon lc$ ).

Sample: MW-I-116  
 Sample ID: S\_20090805\_02  
 File: /homo/Pandey/vnmr/sys/data/Mani/Hike/1  
 Pulse Sequence: s2pul  
 Solvent: cdcl3  
 Temp: 25.0 C / 298.1 K  
 Operator: pandey  
 File: MW-I-116  
 VNMRS-400 "VNMRS400"

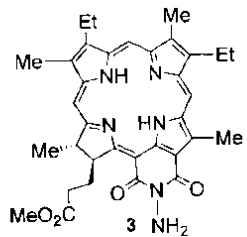

Relax. delay 1.000 sec  
 Pulse 45.0 degrees  
 Acq. time 2.049 sec  
 Width 6410.3 Hz  
 64 repetitions  
 OBSERVE H1, 400.1245595 MHz  
 DATA PROCESSING  
 Resol. enhancement -0.0 Hz  
 FT size 85536  
 Total time 3 min, 22 sec

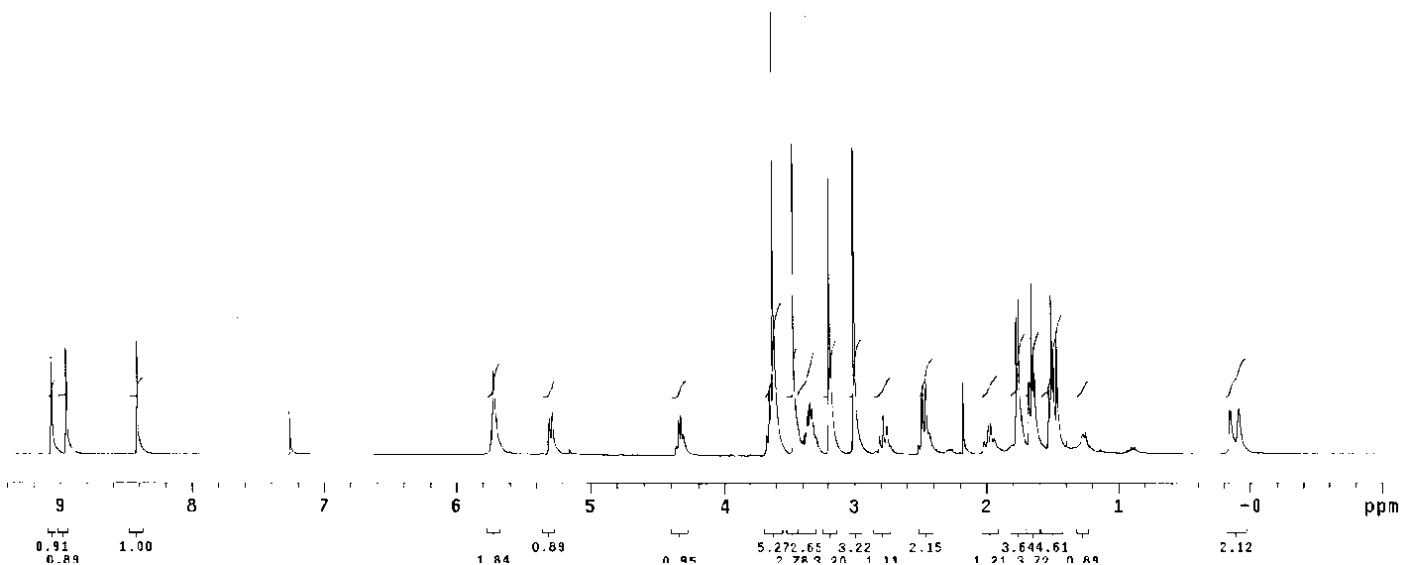

Sample: MW-I-73  
 Sample ID: s\_20080410\_02  
 File: /home/pandey/vnmrsys/data/Hani/MW-I-73.  
 Pulse Sequence: s2pu1  
 Solvent: cdcl3  
 Temp. 25.0 C / 298.1 K  
 Operator: pandey  
 File: MW-I-73  
 VNMR-100 "VNMR400"

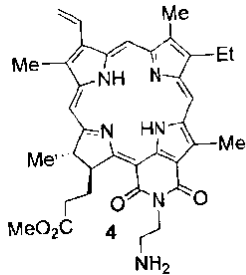

Relax. delay 1.000 sec  
 Pulse 45.0 degrees  
 Acq. time 2.049 sec  
 Width 6419.9 Hz  
 32 repetitions  
 OBSERVE H1, 400.1942403 MHz  
 DATA PROCESSING  
 Resol. enhancement -0.0 Hz  
 FT size 65536  
 Total time 1 min, 41 sec

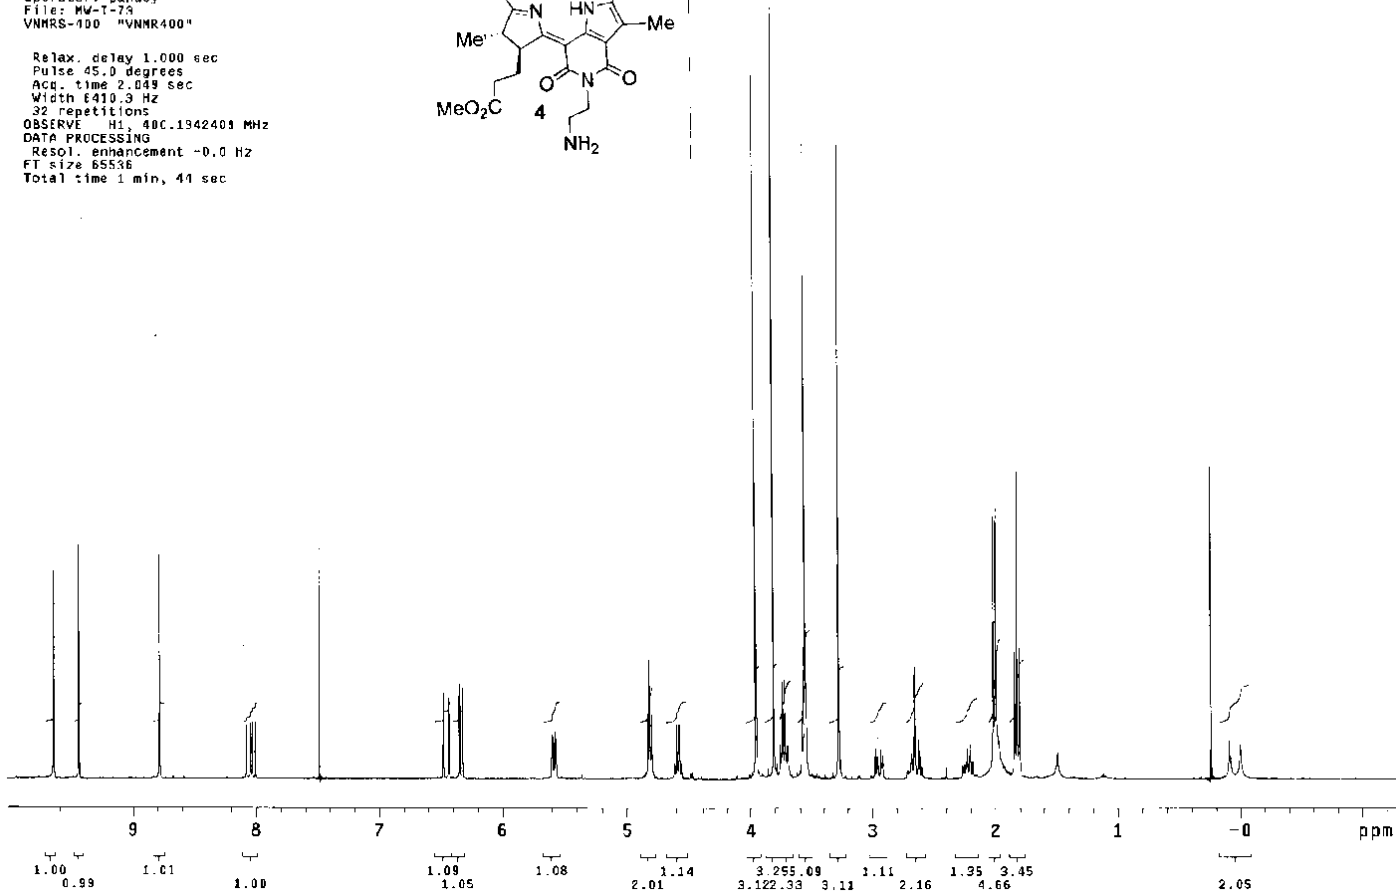

Sample: MW-I-58  
 Sample ID: S\_20290401\_01  
 File: /home/pandey/vnmr/sys/data/Main1/MW-I-58.fid

Pulse Sequence: s2pu1  
 Solvent: cdc13  
 Temp: 25.0 C / 298.1 K  
 Operator: pandey  
 File: MW-I-58  
 VNMR-400 "VNMR400"

Relax. delay 1.000 sec  
 Pulse 45.0 degrees  
 Acq. time 2.049 sec  
 Width 6410.3 Hz  
 32 repetitions  
 OBSERVE H1, 400.1343300 MHz  
 DATA PROCESSING  
 Resol. enhancement -0.0 Hz  
 FT size 65536  
 Total time 1 min, 44 sec

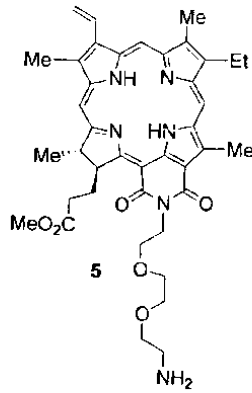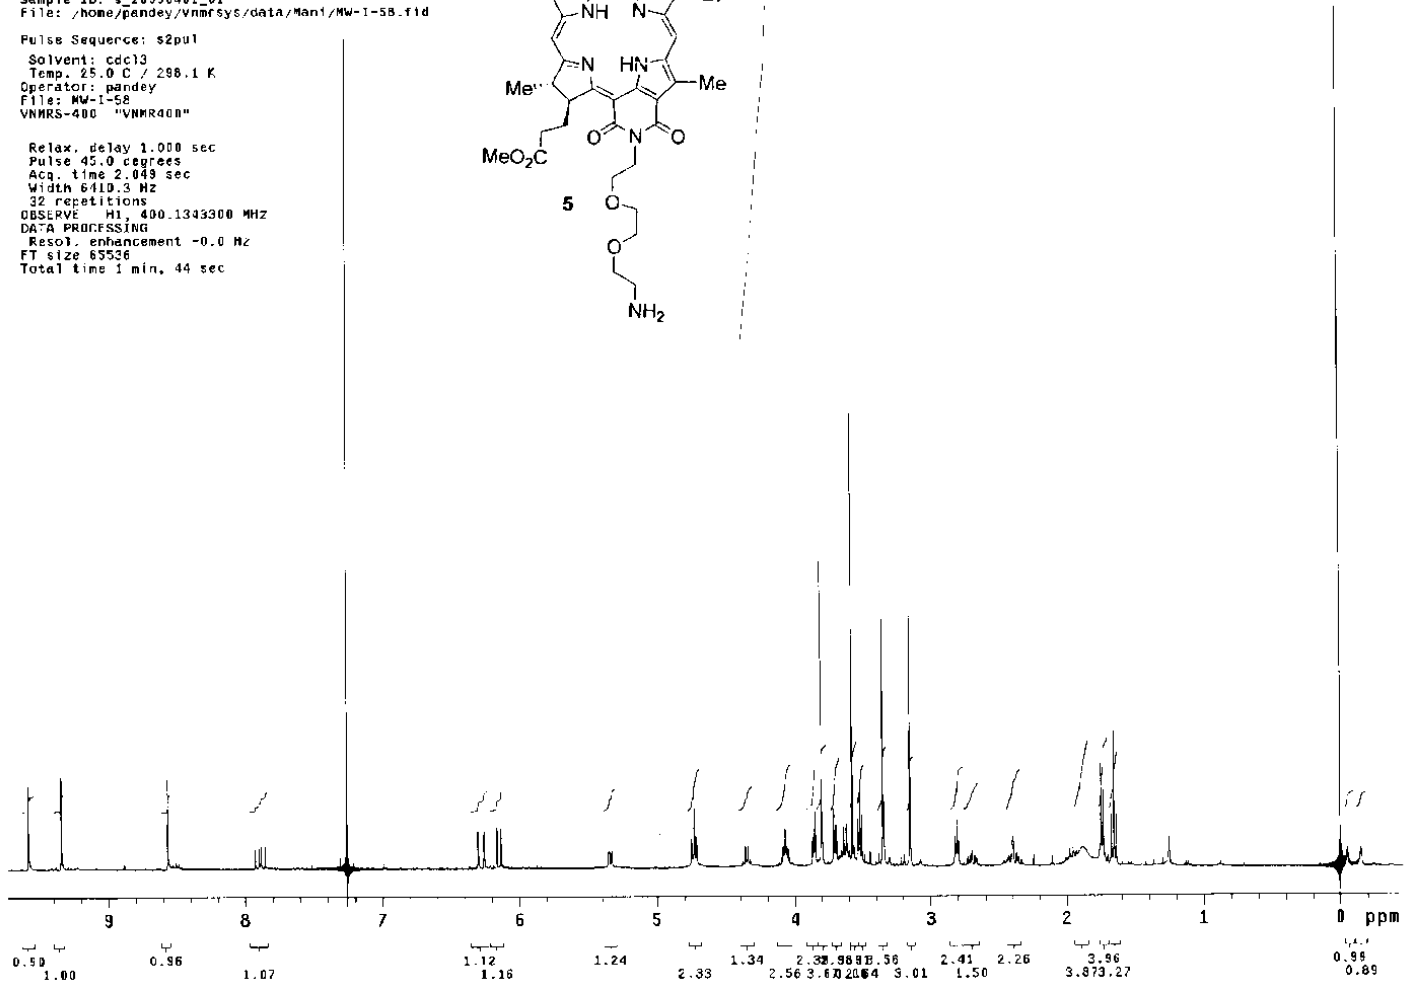

Sample: MW-I-129  
Sample ID: s\_20091204\_01  
File: /home/pandey/vnmr/sys

Pulse Sequence: s2pu1  
Solvent: cd3od  
Temp: 25.0 C / 298.1 K  
Operator: pandey  
File: MW I 129-pure  
VNMR-400 "VNMR400"

Relax. delay 1.000 sec  
Pulse 45.0 degrees  
Acq. time 2.049 sec  
Width 6010.3 Hz  
16 repetitions  
CBSERVE H1, 400.1131133 /  
DATA PROCESSING  
Resol. enhancement -0.0 Hz  
FT size 65536  
Total time 0 min, 55 sec

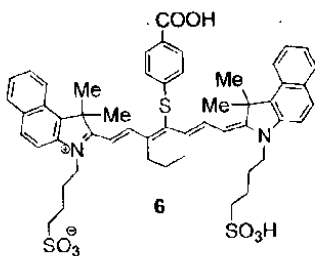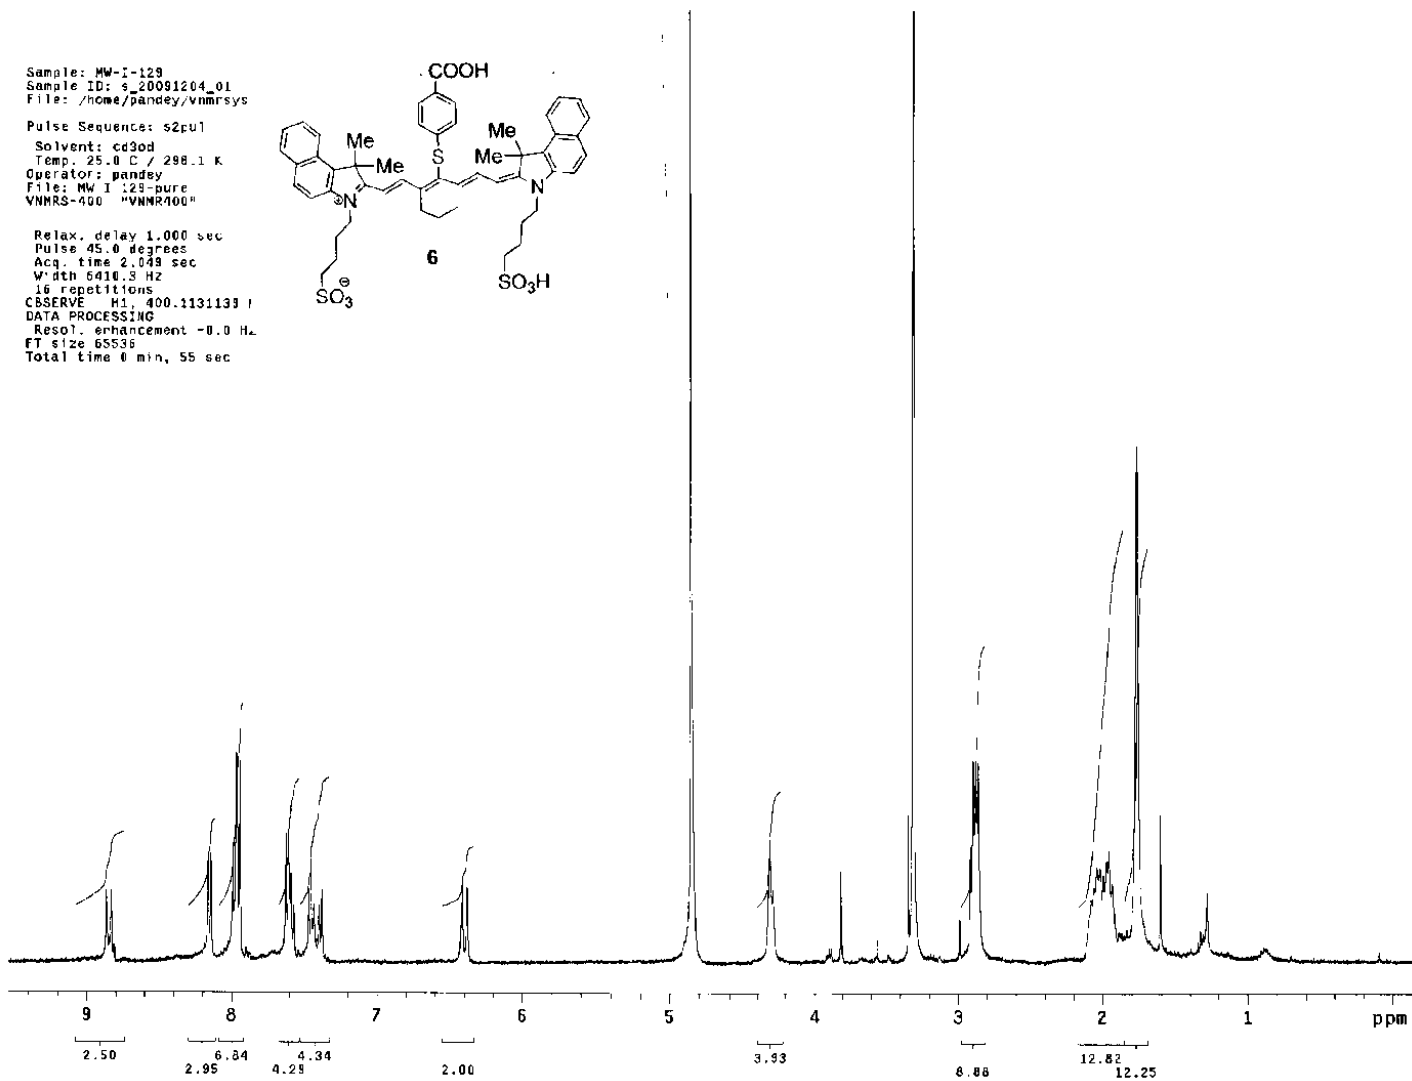

Sample: mw-II-25-DMSO  
 Sample ID: s\_20100608\_01  
 File: /home/pandey/vnmrsys/data/Mani/Mike/M

Pulse Sequence: s2pu1  
 Solvent: dmsd  
 Temp: 25.0 C / 298.1 K  
 Operator: pandey  
 File: MW-II-25\_DMSO  
 VNMRS-400 "VNMR400"

Relax. delay 1.000 sec  
 Pulse 45.0 degrees  
 Acq. time 2.049 sec  
 Width 6410.3 Hz  
 64 repetitions  
 OBSERVE H1, 400.1039848 MHz  
 DATA PROCESSING  
 Resol. enhancement -0.0 Hz  
 FT size 131072  
 Total time 3 min, 22 sec

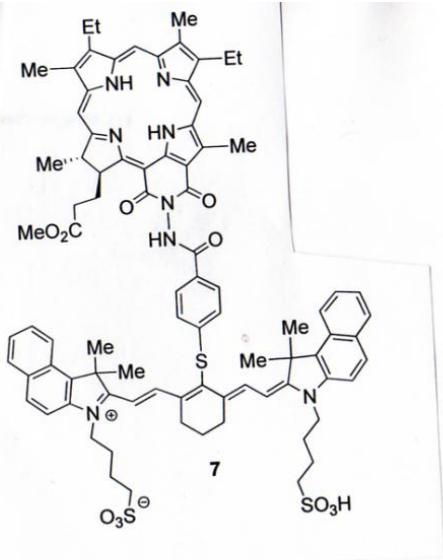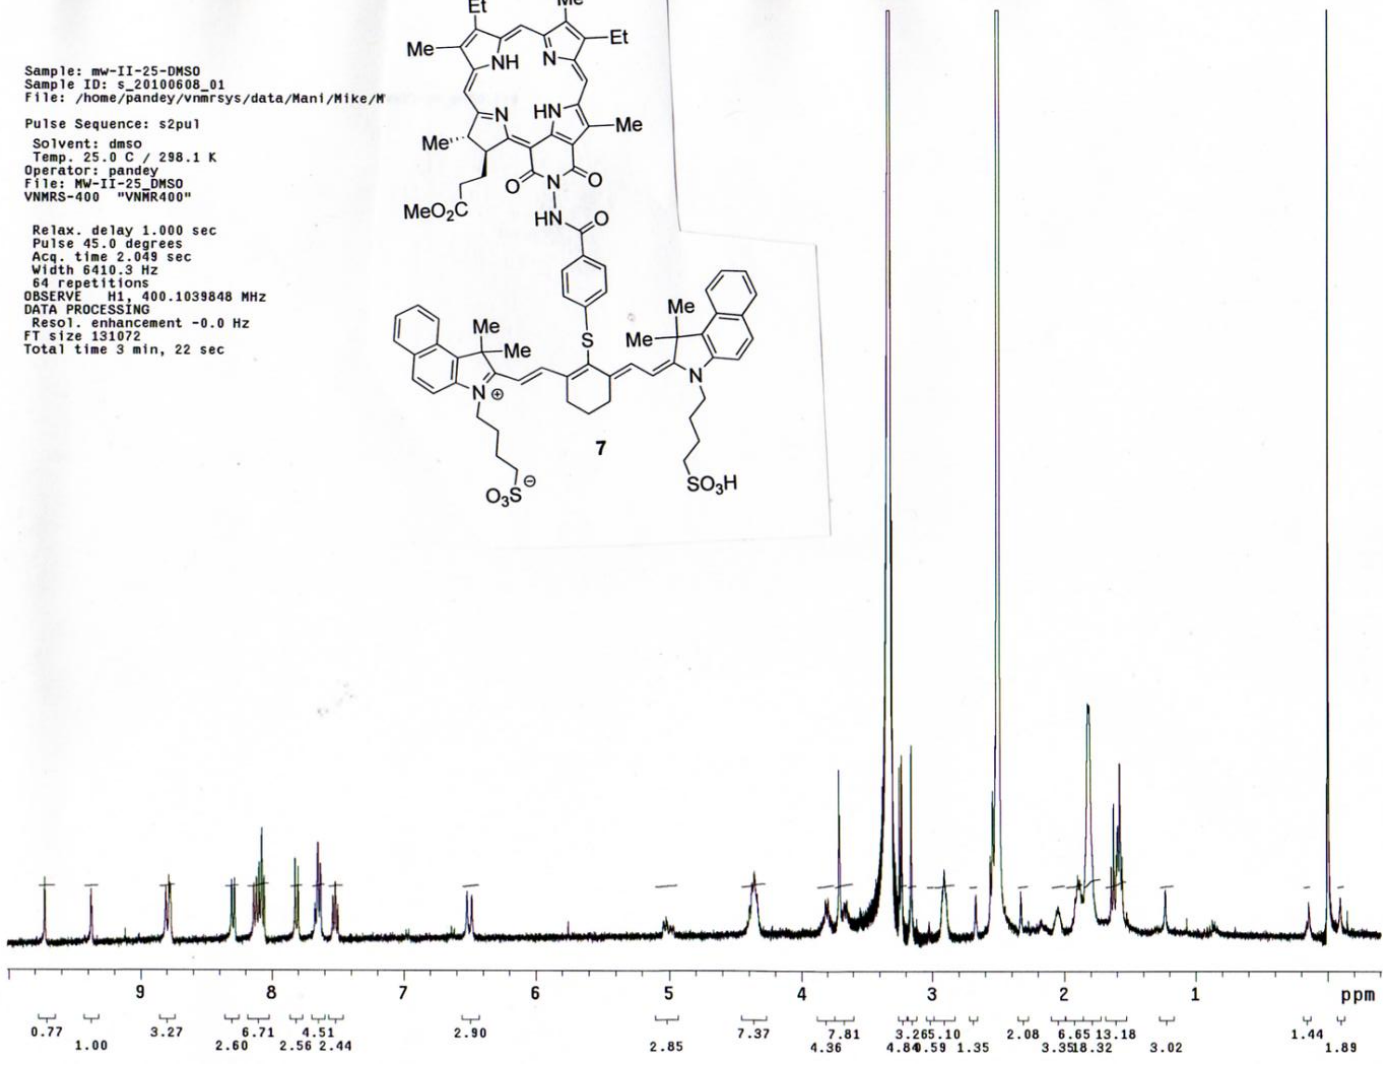



Sample: MW-II-52  
 Sample ID: s\_20100821\_01  
 File: /home/pandey/vnmrsys/data/Mani/Mike/MW-II-5  
 Pulse Sequence: s2pu1  
 Solvent: dmsd  
 Temp. 25.0 C / 298.1 K  
 Operator: pandey  
 File: MW-II-52  
 VNMR-400 "VNMR400"

Relax. delay 1.000 sec  
 Pulse 45.0 degrees  
 Acq. time 2.049 sec  
 Width 6410.3 Hz  
 64 repetitions  
 OBSERVE H1, 400.0912818 MHz  
 DATA PROCESSING  
 Resol. enhancement -0.0 Hz  
 FT size 65536  
 Total time 3 min, 22 sec

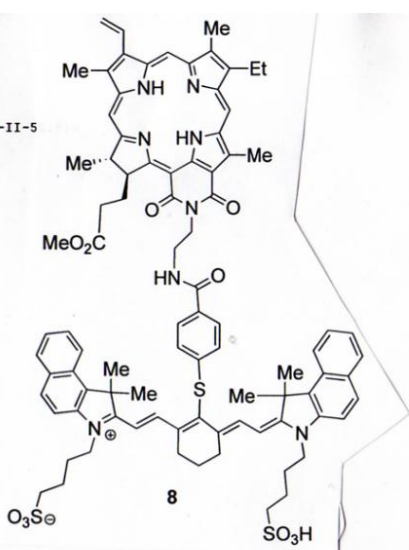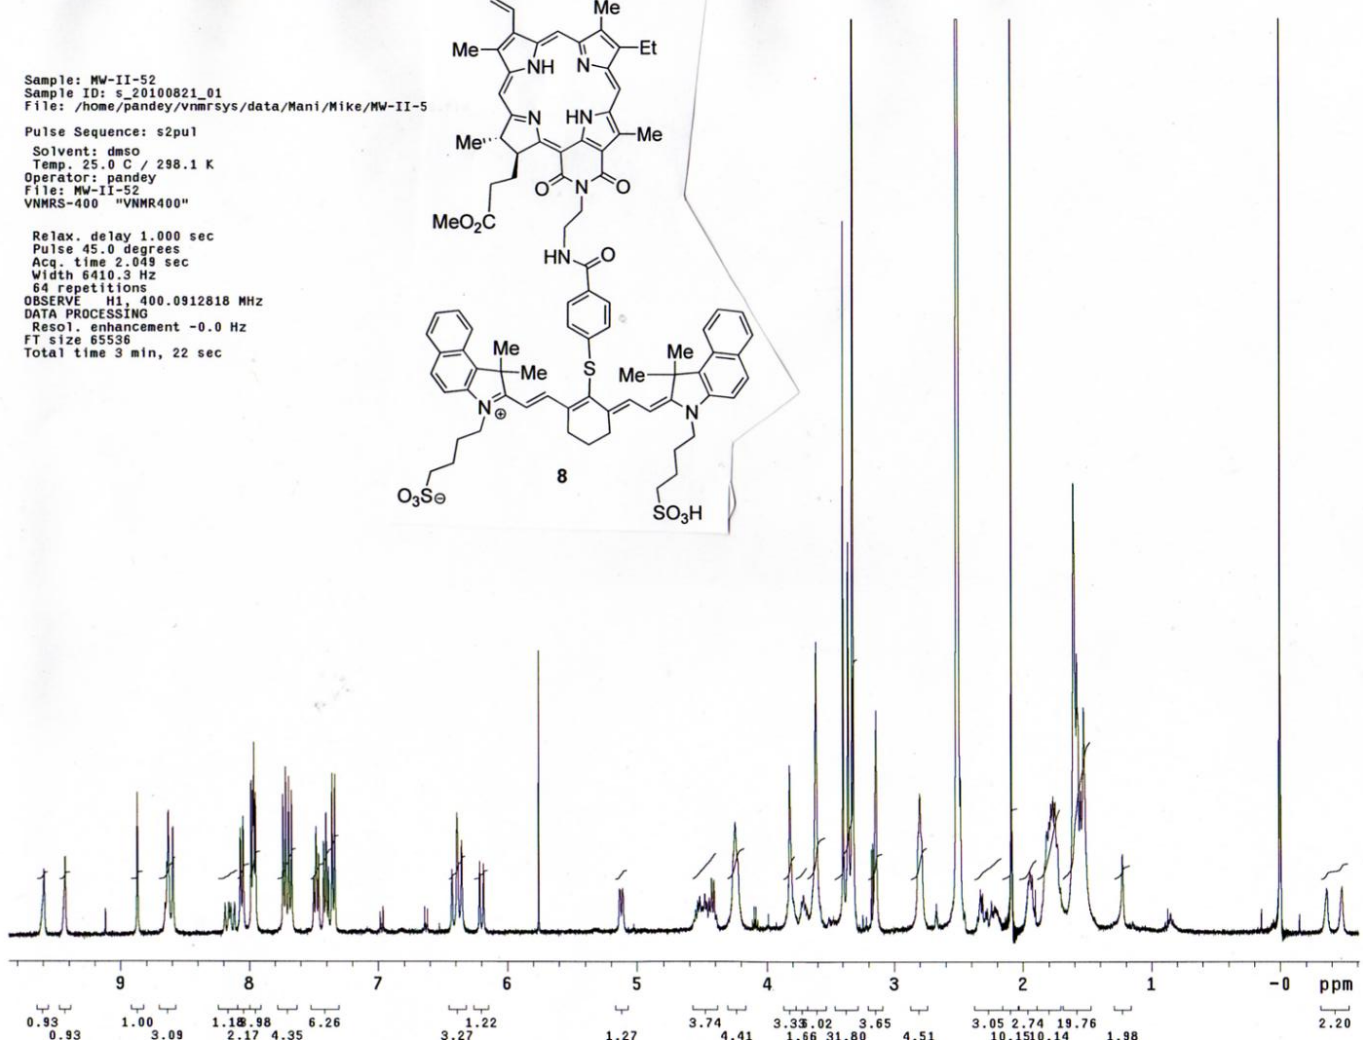

MW-Glycol Conjugate  
 04-01-11  
 BW  
 Sample: MW-Glycol Conjugate\_040111  
 File: /home/pandey/vnmr/sys/data/Mani/Mike  
 Pulse Sequence: s2pu1  
 Solvent: dmsc  
 Temp: 25.0 C / 298.1 K  
 Operator: pandey  
 File: MW-GlycolConjugate\_C40111  
 VNMR-400 'VNMR400'

Relax. delay 1.000 sec  
 Pulse 45.0 degrees  
 Acq. time 2.049 sec  
 Width 8410.3 Hz  
 64 repetitions  
 OBSERVE H1, 400.0782603 MHz  
 DATA PROCESSING  
 Resol. enhancement -0.0 Hz  
 F1 size 65536  
 Total time 3 min, 22 sec

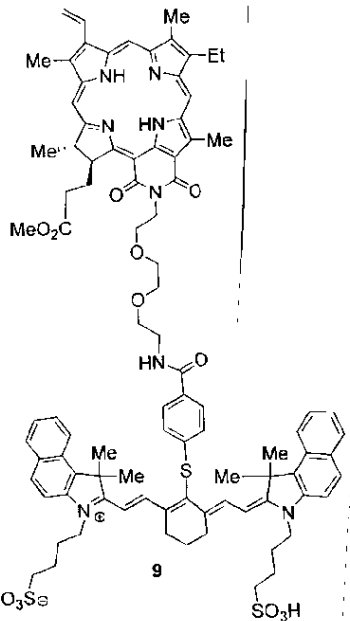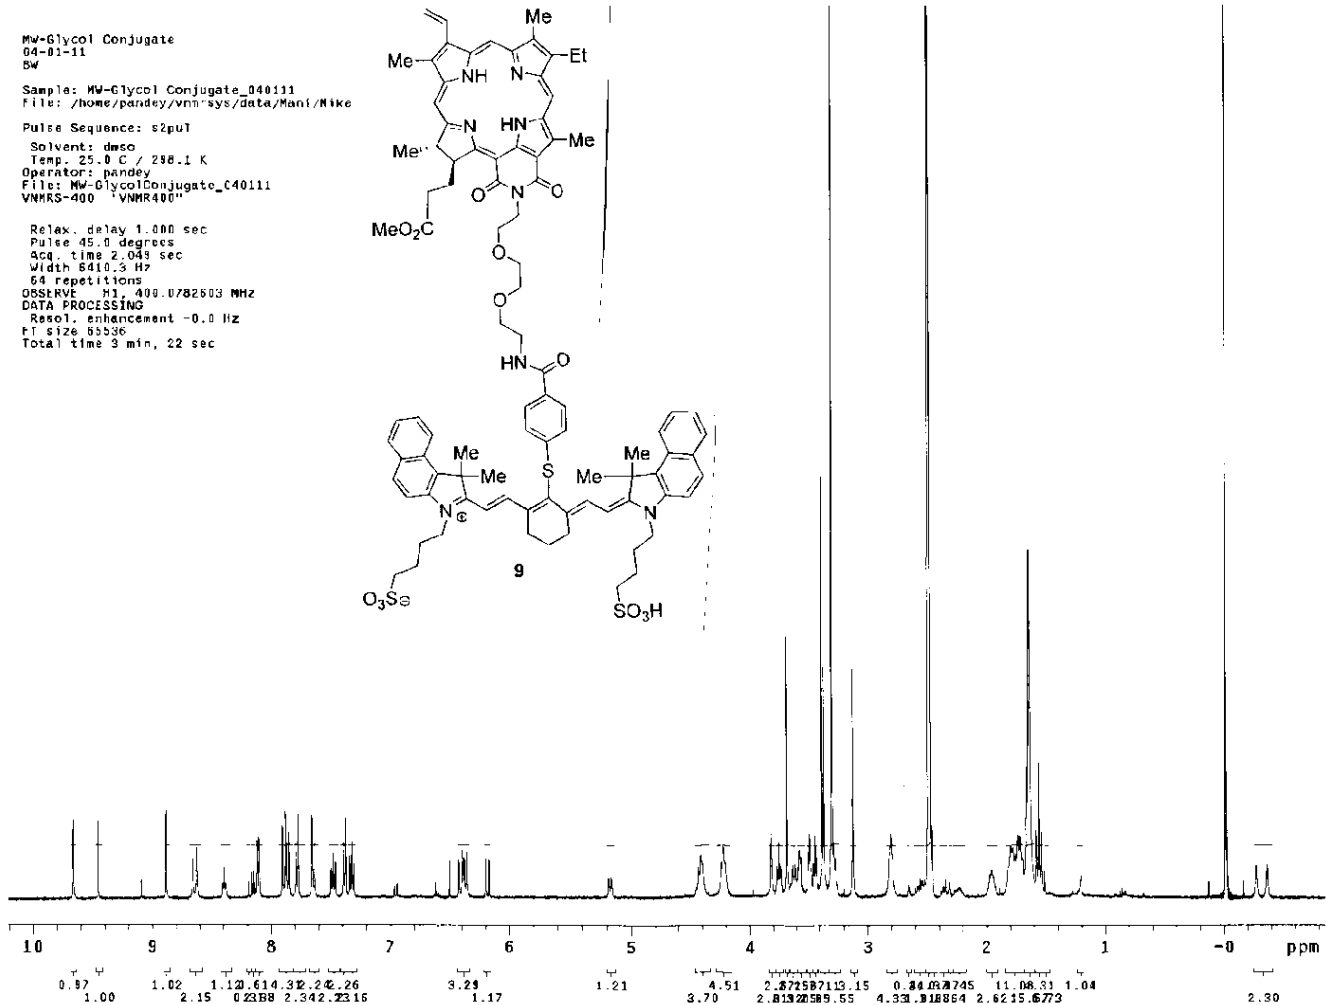

### HPLC Analysis

**Method:** HPLC analysis of conjugates # 7, # 8, and # 9 was carried out using a Waters Delta 600 System consisting of the 600 Controller, 600 Fluid Handling Unit and 996 Photodiode Array Detector equipped with a Waters Symmetry C18 column, 5 micron, with dimensions 4.6 x150mm. The mobile phase flow program was as follows: flow rate of 1.0 ml / min; mobile phase composition - 75% Methanol/ 25% water from 0 to 20 minutes , then a linear gradient to 100% Methanol from 20 minutes to 30 minutes, maintained at 100% Methanol from 30 minutes on.. Data collected and spectrally monitored from 300 nm to 799 nm. Percent purity of compounds based on 416 nm channel.

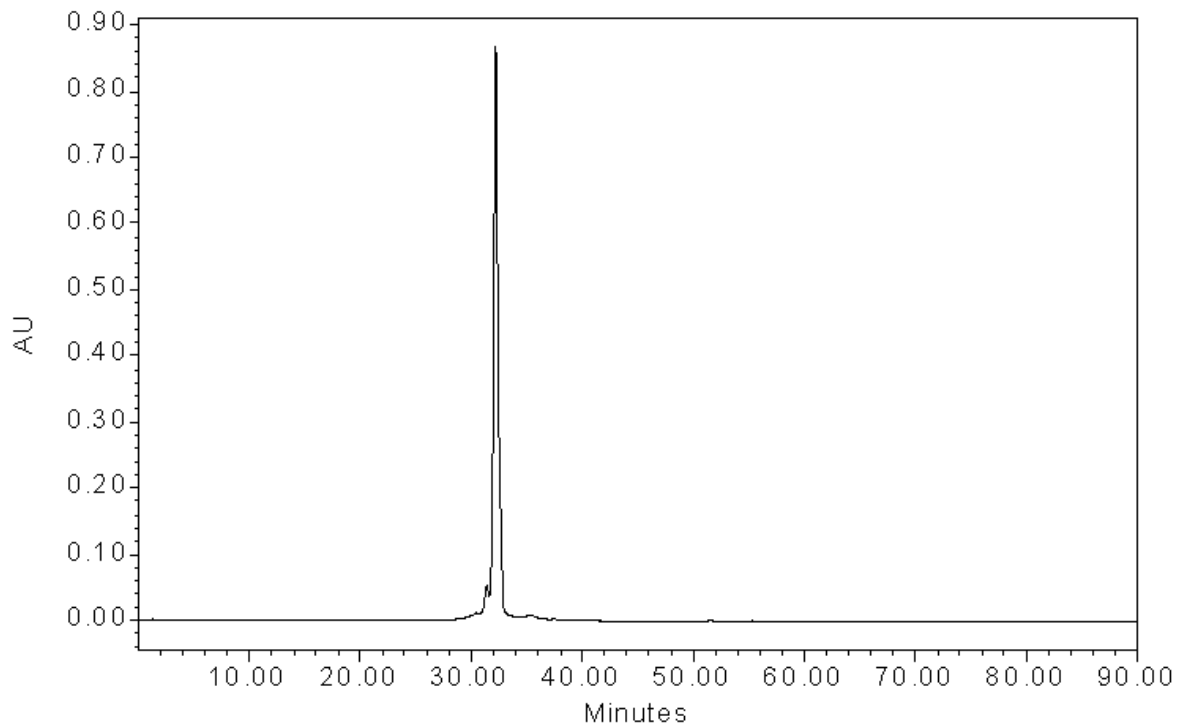

**Figure S1:** HPLC Chromatogram of Conjugate # 7

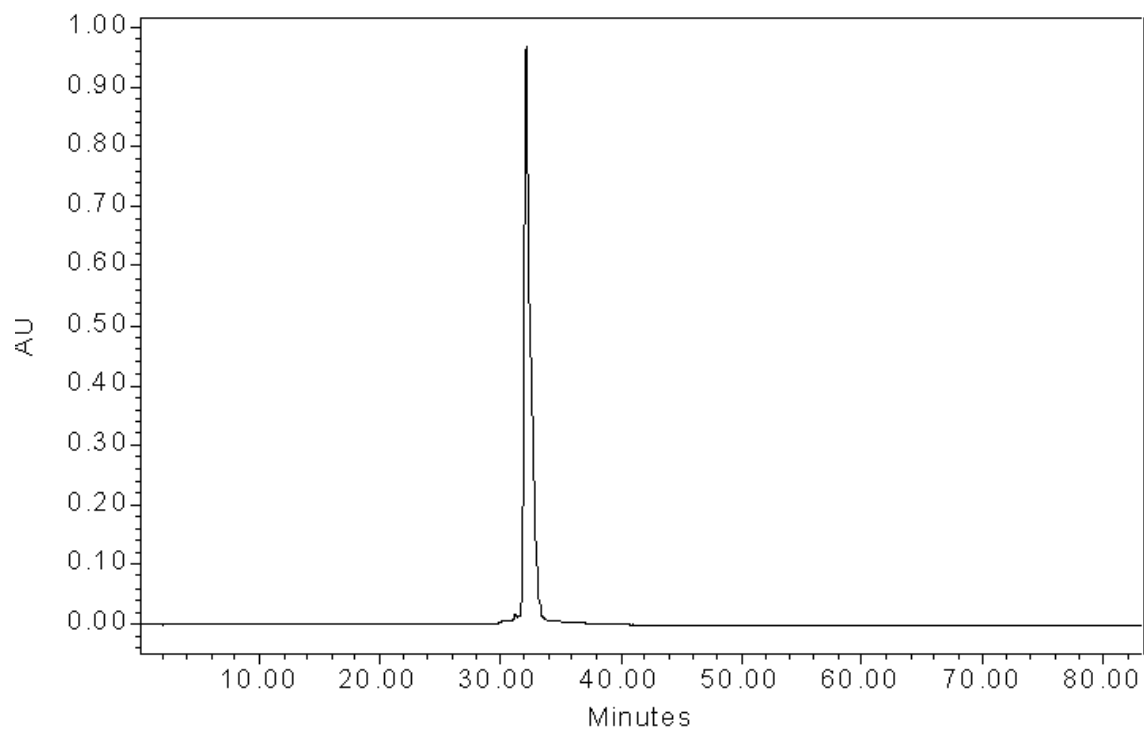

**Figure S2:** HPLC Chromatogram of Conjugate # 8

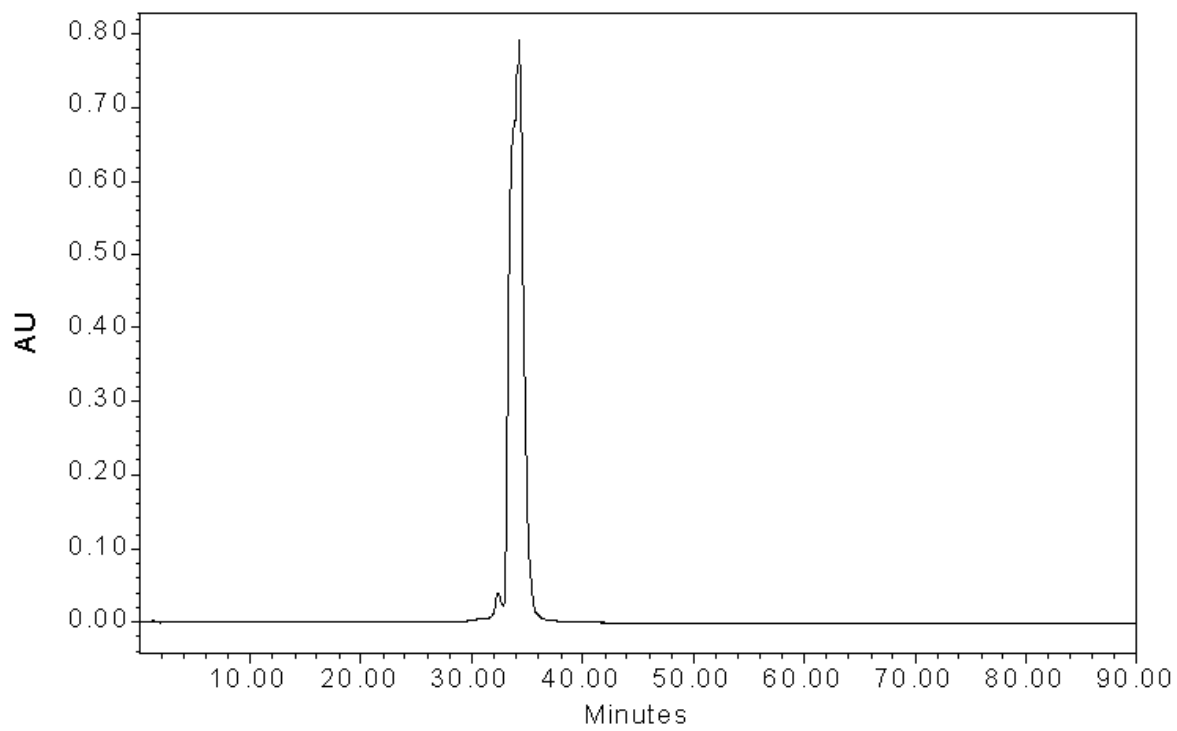

**Figure S3:** HPLC Chromatogram of Conjugate # 9
